# Supplementary material for: Structural analysis of potassium borate solutions
Source: Royal Society of Chemistry journal article supplement (doi:10.1039/d2cp05331d), 2023-01-01
Supplement: d2cp05331d1.pdf [file d2cp05331d1.pdf]

## Supporting information

### Structural Analysis of Potassium Borate Solutions

Fayan Zhu<sup>1,2</sup>, Daniel Bowron<sup>2</sup>, Sabrina Gaertner<sup>2,a</sup>, Chunhui Fang<sup>1</sup>, Yongquan Zhou<sup>1</sup>, Hongyan Liu<sup>1</sup>, Alex C. Hannon<sup>2\*</sup>

<sup>1</sup> Qinghai Institute of Salt Lakes, Chinese Academy of Sciences, Xining 81008

<sup>2</sup> ISIS Facility, STFC, Rutherford Appleton Laboratory, Chilton, Didcot, Oxon OX11 0QX, UK

<sup>a</sup>Current address: Miltenyi Biotec B.V. & Co. KG, (R&D Engineering, Biophysics), Friedrich-Ebert-Straße 68, 51429 Bergisch Gladbach, Germany

\*Correspondence e-mail: alex.hannon@stfc.ac.uk

#### 1 Sample Preparation

##### 1.1 Reagents

H<sub>3</sub><sup>11</sup>B<sub>3</sub>O<sub>3</sub> was purchased from Sigma-Aldrich, and KOH was purchased from Fisher Scientific.

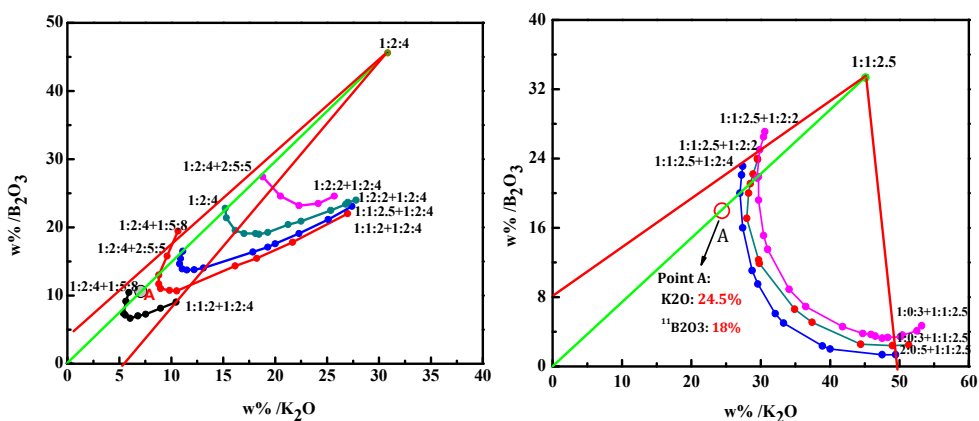

**Figure S1** Ternary phase diagram of K<sub>2</sub>O-B<sub>2</sub>O<sub>3</sub>-H<sub>2</sub>O.

Left, potassium tetraborate phase; right, potassium metaborate phase

##### 1.2 Preparation of Hydrus K<sub>2</sub><sup>11</sup>B<sub>4</sub>O<sub>7</sub>·4H<sub>2</sub>O and K<sup>11</sup>B<sub>2</sub>O<sub>2</sub>·1.33H<sub>2</sub>O Crystals

According to the phase diagram<sup>S1</sup> (Figure S1, left), the composition of point A is 7.1% K<sub>2</sub>O, 10.5% B<sub>2</sub>O<sub>3</sub>. If we prepare 200g of K<sub>2</sub>[B<sub>4</sub>O<sub>5</sub>(OH)<sub>4</sub>] solution, the mass of KOH and H<sub>3</sub><sup>11</sup>B<sub>3</sub>O<sub>3</sub> are as follows:

$$\begin{array}{r|l}
 \begin{array}{l}
 \text{K}_2\text{O} \sim 2\text{KOH} \\
 94.2 \quad 2 \times 56.1 \\
 14.2 \quad x = 16.9 \text{ (g)}
 \end{array}
 &
 \begin{array}{l}
 \text{B}_2\text{O}_3 \sim 2\text{H}_3^{11}\text{B}_3\text{O}_3 \\
 70 \quad 2 \times 62 \\
 10.5 \times 2 \quad y = 37.2 \text{ (g)}
 \end{array}
 \end{array}$$

So we need 16.9 (g) KOH, 37.2 (g) H<sub>3</sub><sup>11</sup>B<sub>3</sub>O<sub>3</sub> to prepare K<sub>2</sub><sup>11</sup>B<sub>4</sub>O<sub>7</sub>·(4H<sub>2</sub>O) crystal.

As shown in Figure S1 (right), the composition of point A is 24.5% K<sub>2</sub>O, 18% <sup>11</sup>B<sub>2</sub>O<sub>3</sub>. If we prepare 100g of KBO<sub>2</sub> solution, the required masses of KOH and H<sub>3</sub>BO<sub>3</sub> are as follows:

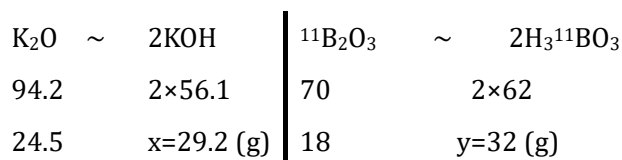

So we need 29.2 (g) KOH, 32 (g)  $H_3^{11}BO_3$  to prepare  $K^{11}BO_2 \cdot 1.33H_2O$  crystal.

The actual weight of KOH and  $H_3^{11}BO_3$  are shown in Table S1.

**Table S1** Weight (grams) of KOH,  $H_3^{11}BO_3$  and  $H_2O$  for preparing borate crystals

|                           | $m_{KOH} \text{ (g)}$ | $m_{H_3^{11}BO_3} \text{ (g)}$ | $m_{H_2O} \text{ (g)}$ |
|---------------------------|-----------------------|--------------------------------|------------------------|
| $K_2^{11}B_4O_7$ solution | 21.3*                 | 37.4**                         | 240                    |
| $K^{11}BO_2$ solution     | 34.5*                 | 32.0                           | 99                     |

\*: the percentage composition of KOH  $\geq 85\%$ , so the actual mass of KOH was calculated by dividing by 0.85.

\*\* : the theoretical value is 37.2 (g), but 37.4 (g)  $H_3^{11}BO_3$  was actually weighted.

The solutions were prepared in a glass beaker, and then gently heated for several minutes to allow the hydrous  $K_2^{11}B_4O_7 \cdot 4H_2O$  and  $K^{11}BO_2 \cdot 1.33H_2O$  crystals to precipitate out. After this, the precipitated crystals were allowed to dry in air for two to three hours, and then they were ground to powder using a mortar and pestle.

### 1.3 Preparation of Anhydrous $K_2^{11}B_4O_7$ and $K^{11}BO_2$ crystals

Figure S2 shows TGA and DSC measurements made on non-isotopic samples of the hydrous crystals  $K_2B_4O_7 \cdot 4H_2O$  and  $KBO_2 \cdot 1.33H_2O$ , using a Netzsch STA 449 F3 synchronous thermal analyzer. We assumed that the thermal behaviour of samples made with  $^{11}B$  does not differ significantly, and the procedures used to dehydrate the hydrous crystals  $K_2^{11}B_4O_7 \cdot 4H_2O$  and  $K^{11}BO_2 \cdot 1.33H_2O$  are based on these TGA and DSC measurements. The TGA trace for  $KBO_2 \cdot 1.33H_2O$  shows evidence of rapid partial dehydration (maybe  $KBO_2 \cdot 1.33H_2O \rightarrow KBO_2 \cdot 0.33H_2O$ ) occurring at 160 °C, followed by complete dehydration at  $\sim 206$  °C. The behaviour of  $K_2B_4O_7 \cdot 4H_2O$  is very different; dehydration begins at a temperature close to 100 °C, but proceeds very slowly and is not complete until a temperature  $\sim 400$  °C. The DSC trace shows evidence of an exothermic event at  $\sim 550$  °C, and so this temperature was used to ensure that this sample was dried thoroughly.

Firstly, the solutions were put into a furnace at 170 °C for 2 hours to remove most of the water of crystallisation, and then the temperature was increased (to 208 °C for  $K^{11}BO_2 \cdot 1.33H_2O$ , and to 550 °C for  $K_2^{11}B_4O_7 \cdot 4H_2O$ ) to complete the dehydration process. The samples were removed from the furnace every two hours to check the weight loss. The details are shown in Table S2. The penultimate column of Table S2 shows the mass loss as a fraction of the initial sample mass, whilst the final column shows the theoretical fraction of the mass of each hydrous crystal that is  $H_2O$ . The values in these columns are evidence that

the crystals were thoroughly dehydrated. The fractional mass loss is not expected to be exactly the same as the theoretical value, firstly due to the possible presence of residual liquid water. Furthermore, for  $K_2^{11}B_4O_7 \cdot 4H_2O$  there was a serious agglomeration at 170 °C, producing a bubble in the crucible, and hence the crucible was removed from the furnace and the agglomeration was ground to a powder; there was the possibility of mass loss during this process.

**Table S2** The mass of porcelain crucibles (cru.) and samples (samp.) during the dehydration process

| Cru. number                                    | Empty cru. (g) | Cru. + samp. (g) | Cru. + samp. during dehydration process (g) |         |         |         | *      | **     |
|------------------------------------------------|----------------|------------------|---------------------------------------------|---------|---------|---------|--------|--------|
|                                                |                |                  | 170 °C                                      | 550°C   | 550°C   | 550°C   |        |        |
| <b><math>K_2^{11}B_4O_7 \cdot 4H_2O</math></b> |                |                  |                                             |         |         |         |        |        |
| 1                                              | 28.6213        | 31.0766          | 30.4944                                     | 30.5061 | 30.4937 | 30.4922 | 0.2076 |        |
| 2                                              | 29.4853        | 32.1485          | 31.5150                                     | 31.5232 | 31.5102 | 31.5104 | 0.2396 | 0.2349 |
| 3                                              | 30.0013        | 32.5822          | 31.9661                                     | 31.8874 | 31.8730 | 31.8734 | 0.2746 |        |
| 4                                              | 30.9508        | 33.4068          | 32.8202                                     | 32.8212 | 32.8034 | 32.8071 | 0.2442 |        |
| <b><math>K^{11}BO_2 \cdot 1.33H_2O</math></b>  |                |                  |                                             |         |         |         |        |        |
|                                                |                |                  | 170 °C                                      | 208°C   | 208°C   | 208°C   |        |        |
| 1                                              | 30.9503        | 33.5075          | 32.9787                                     | 32.9513 | 32.9419 | 32.9315 | 0.2253 |        |
| 2                                              | 28.6208        | 31.4425          | 30.8841                                     | 30.8287 | 30.8195 | 30.8045 | 0.2261 |        |
| 3                                              | 29.4854        | 32.2454          | 31.7081                                     | 31.6435 | 31.6355 | 31.6232 | 0.2254 | 0.2263 |
| 4                                              | 30.0015        | 33.2255          | 32.5852                                     | 32.5258 | 32.5098 | 32.5037 | 0.2239 |        |

\*, Mass loss as a fraction of the initial sample mass; \*\*, Theoretical fraction of the mass that is H<sub>2</sub>O in  $K_2^{11}B_4O_7 \cdot 4H_2O$  and  $K^{11}BO_2 \cdot 1.33H_2O$ .

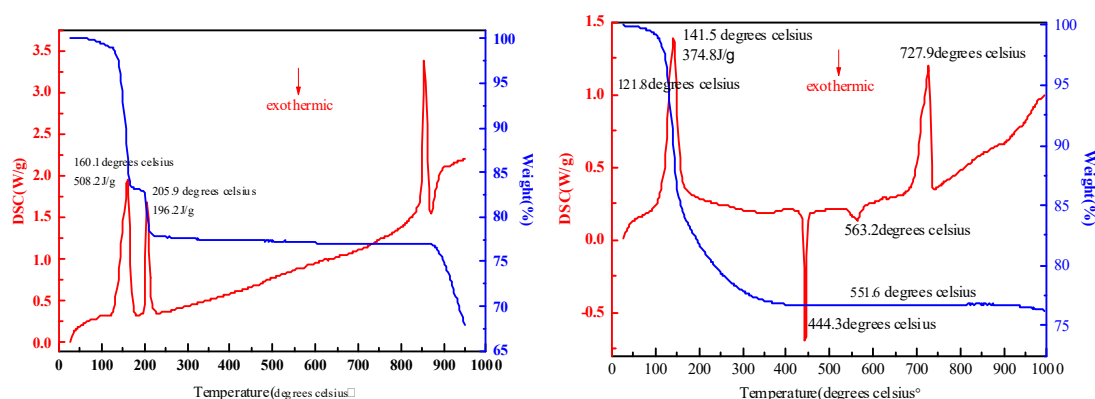

**Figure S2.** TGA and DSC of hydrous borates  $KBO_2 \cdot 1.33H_2O$  (left panel) and  $K_2B_4O_7 \cdot 4H_2O$  (right panel)

## 2 Characterization

A PANalytical X'pert Pro X-ray diffractometer using  $K\alpha$  radiation from an Rh-filtered Ag anode ( $\lambda=0.5609 \text{ \AA}$ ) operating at 60 kV<sup>S2</sup> was used to characterise the hydrous crystals as shown in Figure S3. The measured diffraction patterns are compared with simulated<sup>S3</sup> diffraction patterns for crystal structure reports from the literature for  $KBO_2 \cdot 1.33H_2O$  (ICSD\_1235)<sup>S4</sup> and  $K_2B_4O_7 \cdot 4H_2O$  (ICSD\_34648).<sup>S5</sup> It can qualitatively be confirmed that the hydrous samples are  $K^{11}BO_2 \cdot 1.33H_2O$  and  $K_2^{11}B_4O_7 \cdot 4H_2O$ .

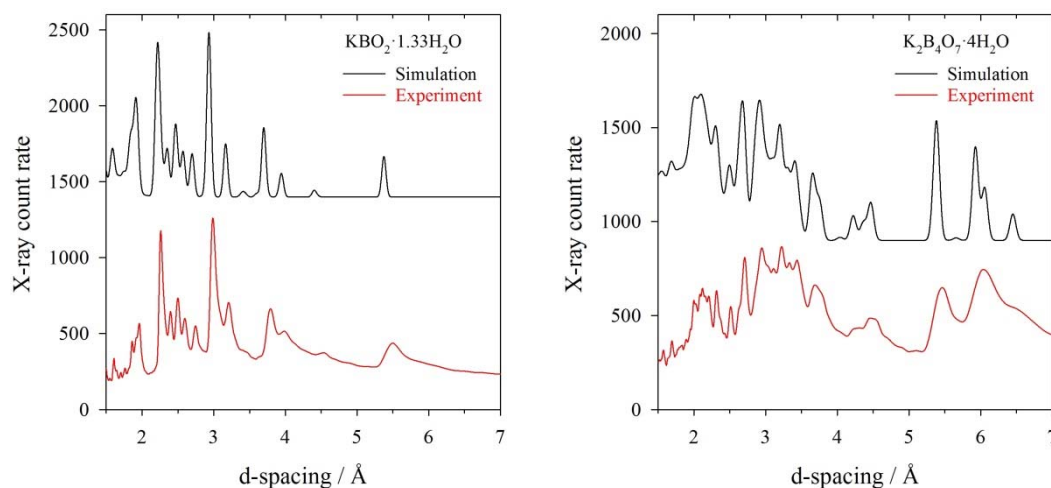

**Figure S3** X-ray diffraction characterisation of the hydrous borate crystals  $K^{11}BO_2 \cdot 1.33H_2O$  (left hand panel) and  $K_2^{11}B_4O_7 \cdot 4H_2O$  (right hand panel). The lower red curves are experimental data, measured in a fused silica capillary on a PANalytical X'pert Pro X-ray diffractometer using  $K\alpha$  radiation from a Rh-filtered Ag anode ( $\lambda=0.5609 \text{ \AA}$ ) operating at 60 kV. The upper black curves (displaced vertically for clarity) are simulations of the XRD patterns for the reported structures of  $KBO_2 \cdot 1.33H_2O$ <sup>S4</sup> (left hand panel) and  $K_2B_4O_7 \cdot 4H_2O$ <sup>S5</sup> (right hand panel). The simulations were calculated using CrystalMaker software,<sup>S3</sup> with a simple Gaussian broadening, sufficient to demonstrate that the expected hydrous borate crystal phase was prepared.

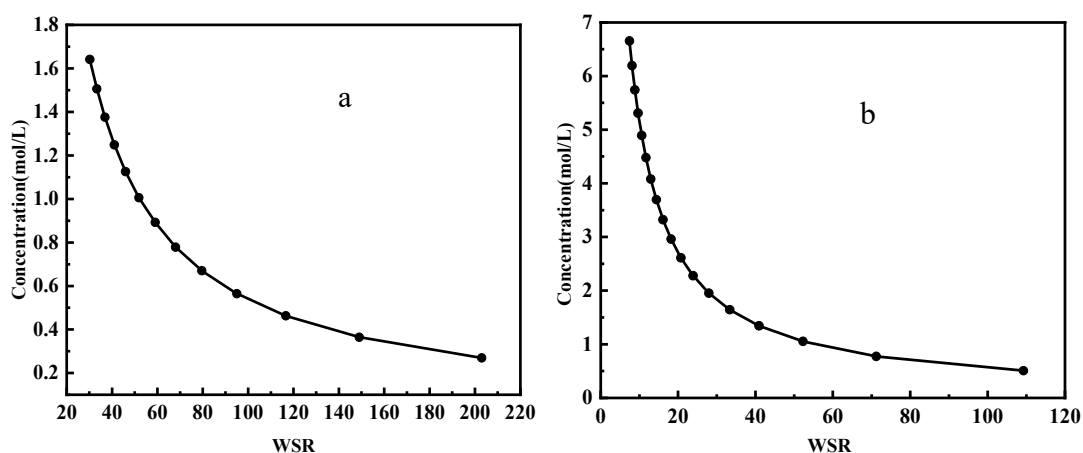

**Figure S4** Relationship between water-salt molar ratio (WSR) and concentration (mol/L). a: low salt content, b: high salt content.

**Table S3 Details of structural models of B(OH)<sub>3</sub> and B(OH)<sub>4</sub><sup>-</sup>**

| Point group                      | B-O/Å                                                                      | ∠O-B-O/°                                                                                                                                           | SPE/a.u.  | ΔE/kJ/mol |  |
|----------------------------------|----------------------------------------------------------------------------|----------------------------------------------------------------------------------------------------------------------------------------------------|-----------|-----------|--|
| <i>trans</i> -B(OH) <sub>3</sub> | C <sub>3h</sub><br>1.366                                                   | 120.0                                                                                                                                              | -252.4659 | 0         |  |
| <i>cis</i> -B(OH) <sub>3</sub>   | C <sub>s</sub><br>B(1)-O(2): 1.369<br>B(1)-O(6): 1.366<br>B(1)-O(4): 1.365 | ∠O(2)-B(1)-O(6): 125.4<br>∠O(2)-B(1)-O(4): 118.8<br>∠O(6)-B(1)-O(4): 115.8                                                                         | -252.4637 | 5.8       |  |
| B(OH) <sub>4</sub> <sup>-</sup>  | S <sub>4</sub><br>1.473                                                    | ∠O(8)-B(1)-O(6):107.4<br>∠O(8)-B(1)-O(4):113.7<br>∠O(8)-B(1)-O(2):107.4<br>∠O(6)-B(1)-O(4):107.4<br>∠O(6)-B(1)-O(2):113.7<br>∠O(4)-B(1)-O(2):107.4 | -328.4238 |           |  |

***trans*-B(OH)<sub>3</sub>(H<sub>2</sub>O)<sub>n</sub>**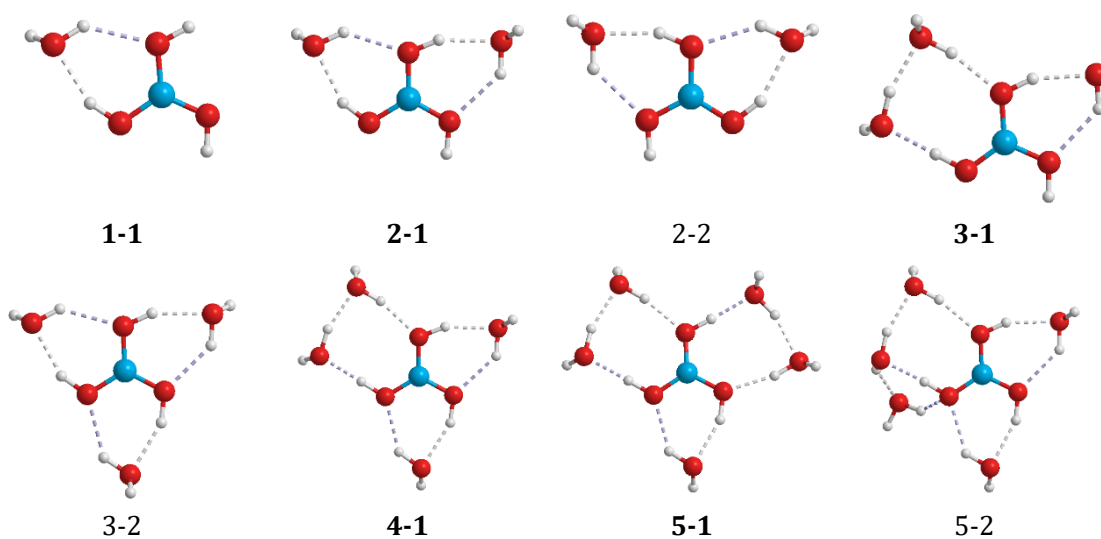

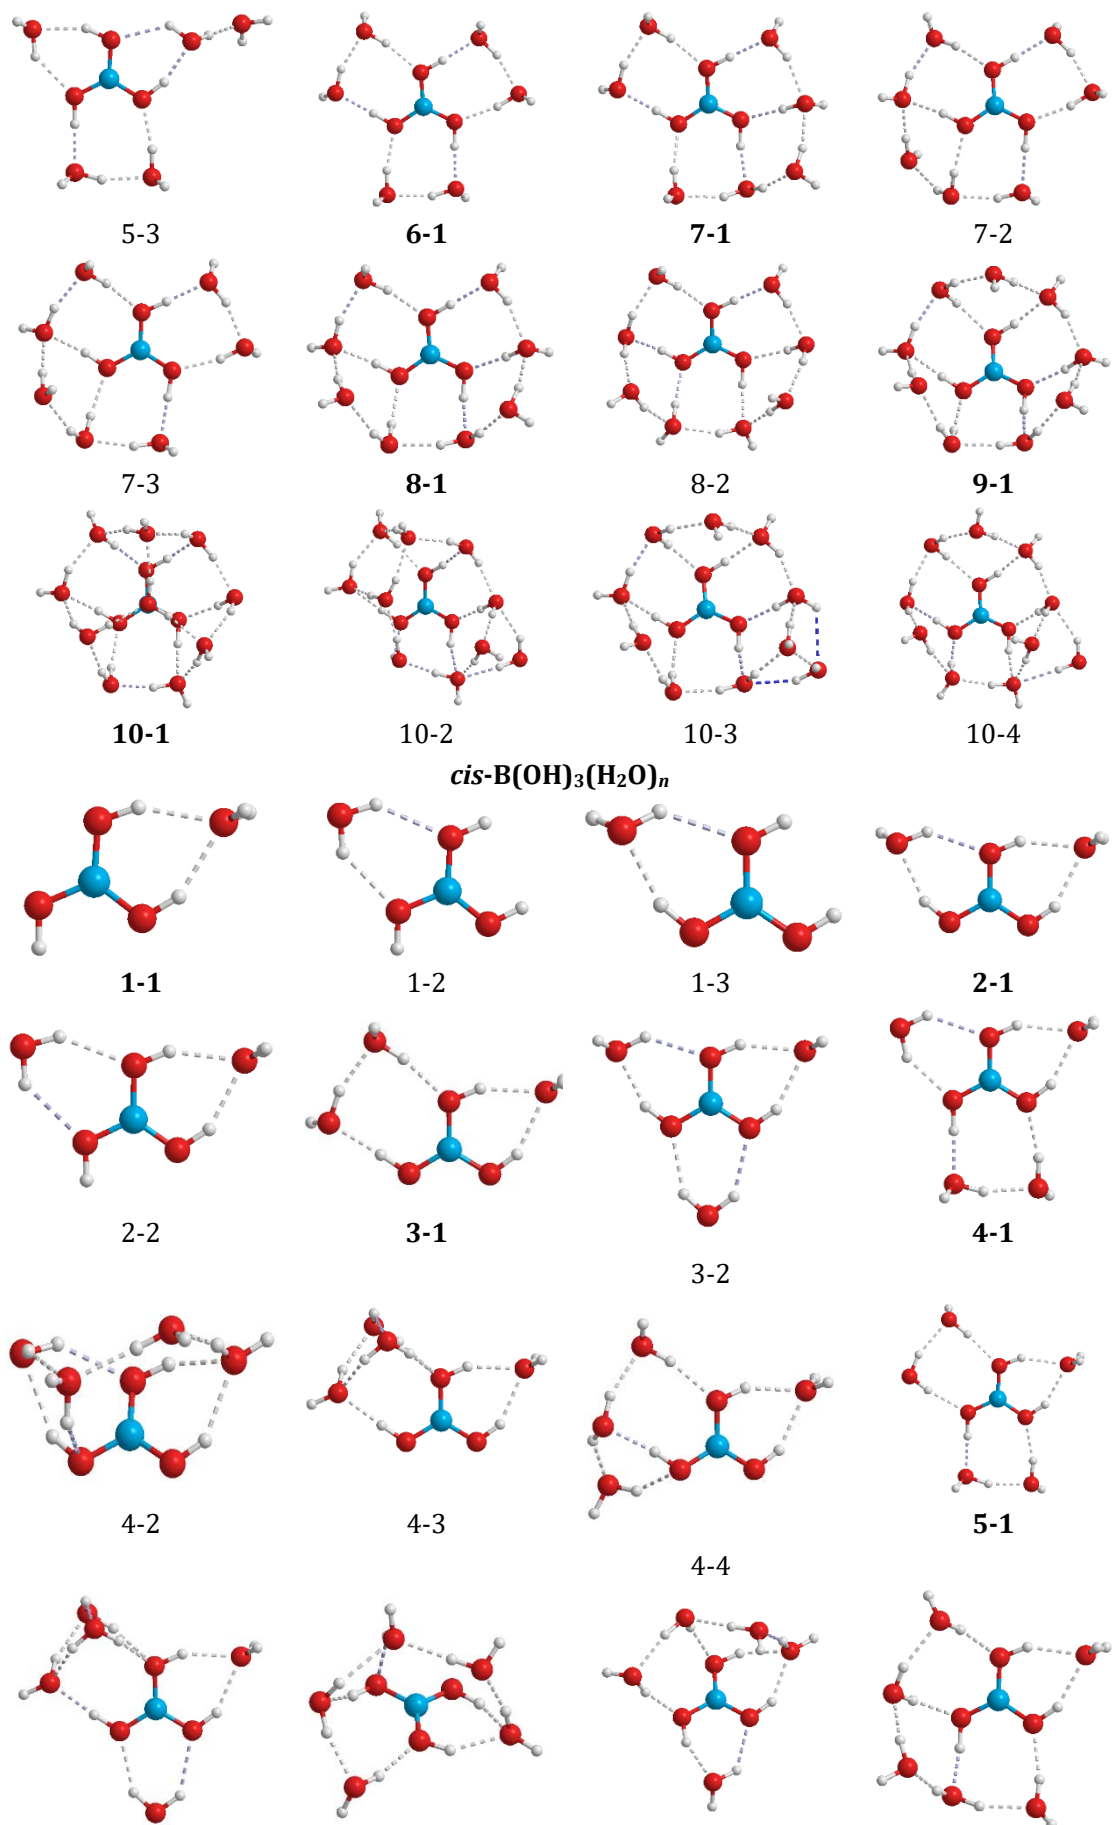

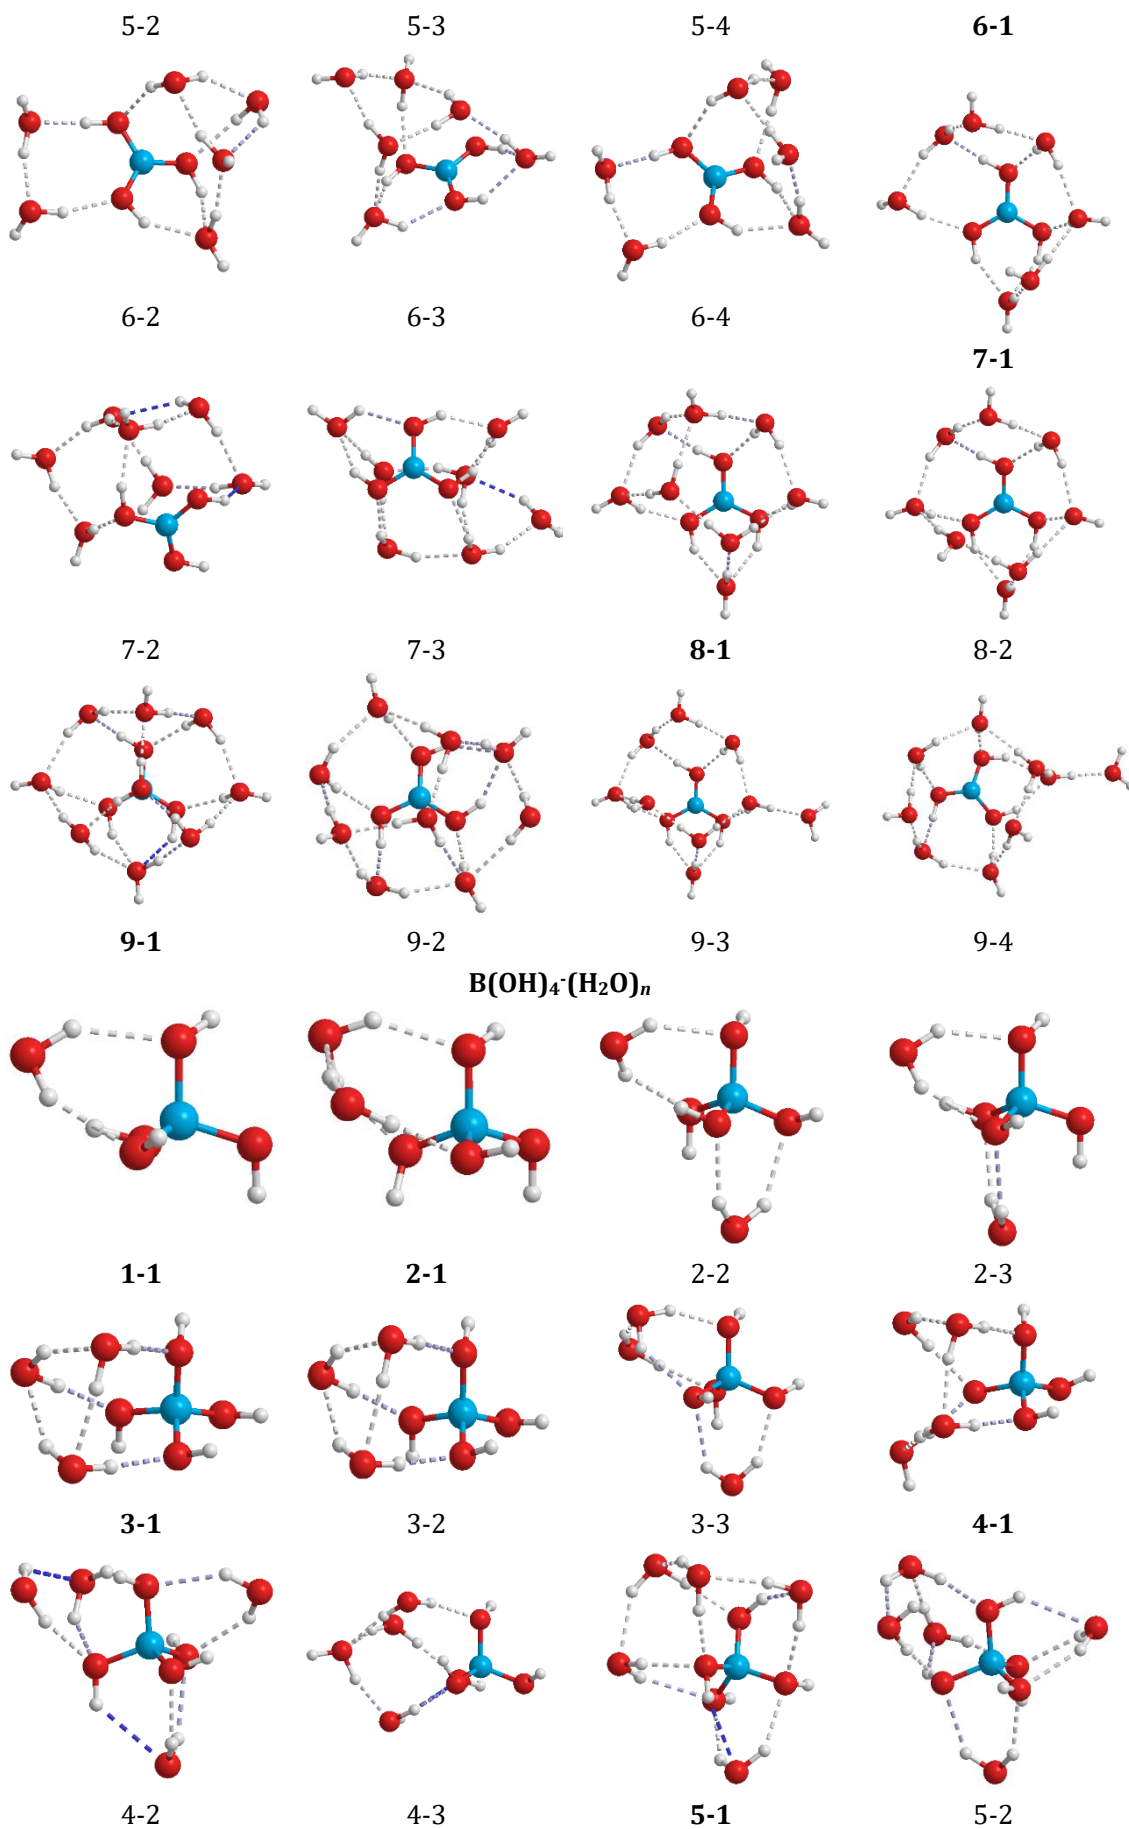

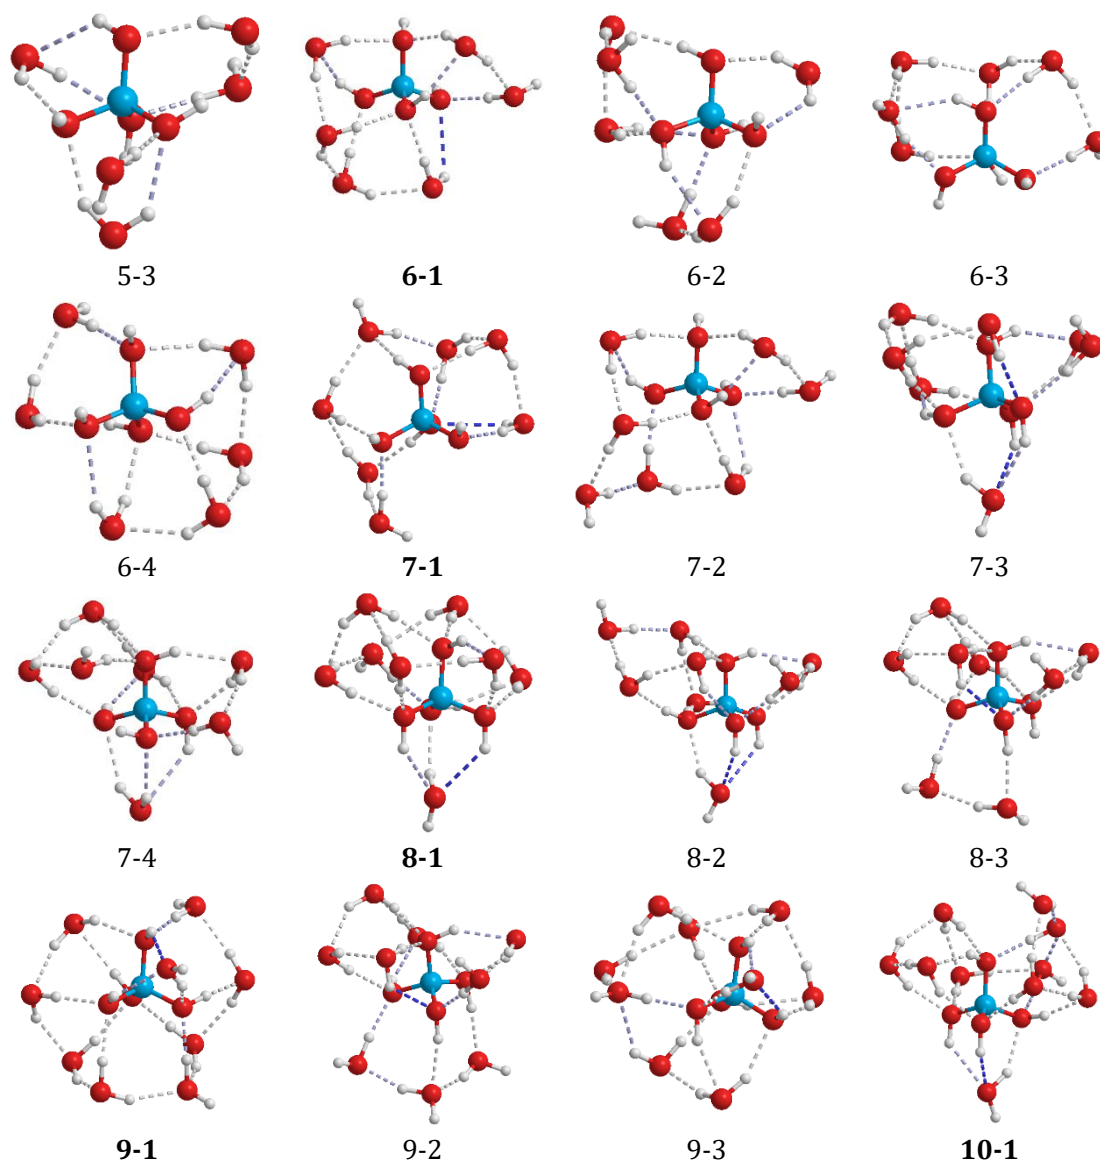

**Figure S5** Optimized structures of  $[\text{B}(\text{OH})_3(\text{H}_2\text{O})_n]$  and  $[\text{B}(\text{OH})_4^-(\text{H}_2\text{O})_n]$  clusters

**Table S4** Energy data for  $[\text{B}(\text{OH})_3(\text{H}_2\text{O})_n]$  and  $[\text{B}(\text{OH})_4^-(\text{H}_2\text{O})_n]$  clusters

| $n$                                                                          | $E_0/\text{a.u.}$ | $E/\text{a.u.}$ | $H/\text{a.u.}$ | $G/\text{a.u.}$ | $\Delta E_0/(\text{kJ}/\text{mol})$ | $\Delta E/(\text{kJ}/\text{mol})$ | $\Delta H/(\text{kJ}/\text{mol})$ | $\Delta G/(\text{kJ}/\text{mol})$ |
|------------------------------------------------------------------------------|-------------------|-----------------|-----------------|-----------------|-------------------------------------|-----------------------------------|-----------------------------------|-----------------------------------|
| <b><i>trans</i>-<math>\text{B}(\text{OH})_3(\text{H}_2\text{O})_n</math></b> |                   |                 |                 |                 |                                     |                                   |                                   |                                   |
| 1-1                                                                          | -328.8831         | -328.8757       | -328.8747       | -328.9141       | -15.75                              | -15.23                            | -101.08                           | 18.64                             |
| 2-1                                                                          | -405.3017         | -405.2912       | -405.2903       | -405.3370       | -35.18                              | -33.87                            | -122.61                           | 34.13                             |
| 3-1                                                                          | -481.7217         | -481.7084       | -481.7075       | -481.7617       | -58.29                              | -56.97                            | -148.34                           | 44.90                             |
| 3-2                                                                          | -481.7204         | -481.7069       | -481.7060       | -481.7598       | -54.87                              | -53.04                            | -144.40                           | 49.88                             |
| 4-1                                                                          | -558.1403         | -558.1242       | -558.1232       | -558.1841       | -77.71                              | -76.40                            | -170.13                           | 61.70                             |
| 5-1                                                                          | -634.5605         | -634.5417       | -634.5408       | -634.6091       | -101.34                             | -100.29                           | -196.91                           | 71.68                             |
| 5-2                                                                          | -634.5557         | -634.5363       | -634.5354       | -634.6039       | -88.74                              | -86.12                            | -182.73                           | 85.33                             |



|                                                                 |                  |                  |                  |                  |         |         |         |        |
|-----------------------------------------------------------------|------------------|------------------|------------------|------------------|---------|---------|---------|--------|
| 5-4                                                             | -634.5569        | -634.5372        | -634.5362        | -634.6078        | -91.89  | -88.48  | -184.84 | 75.09  |
| <b>6-1</b>                                                      | <b>-710.9808</b> | <b>-710.9594</b> | <b>-710.9584</b> | <b>-711.0333</b> | -125.24 | -124.71 | -223.69 | 83.75  |
| <b>7-1</b>                                                      | <b>-787.3996</b> | <b>-787.3753</b> | <b>-787.3743</b> | <b>-787.4561</b> | -145.19 | -144.40 | -246.01 | 99.51  |
| 7-2                                                             | -787.3990        | -787.3748        | -787.3739        | -787.4549        | -143.61 | -143.09 | -244.96 | 102.66 |
| 7-3                                                             | -787.3996        | -787.3752        | -787.3743        | -787.4554        | -145.19 | -144.14 | -246.01 | 101.34 |
| <b>8-1</b>                                                      | <b>-863.8180</b> | <b>-863.7911</b> | <b>-863.7902</b> | <b>-863.8766</b> | -164.09 | -163.83 | -268.33 | 121.30 |
| 8-2                                                             | -863.8170        | -863.7902        | -863.7892        | -863.8758        | -161.47 | -161.47 | -265.70 | 123.40 |
| <b>9-1</b>                                                      | <b>-940.2357</b> | <b>-940.2064</b> | <b>-940.2055</b> | <b>-940.2974</b> | -181.16 | -181.95 | -289.07 | 142.30 |
| <b>10-1</b>                                                     | <b>-1016.664</b> | <b>-1016.633</b> | <b>-1016.632</b> | <b>-1016.722</b> | -226.06 | -229.73 | -339.21 | 153.33 |
| 10-2                                                            | -1016.6561       | -1016.6245       | -1016.6235       | -1016.7183       | -205.31 | -207.41 | -316.90 | 163.04 |
| 10-3                                                            | -1016.6522       | -1016.6206       | -1016.6196       | -1016.7155       | -195.07 | -197.18 | -306.66 | 170.39 |
| 10-4                                                            | -1016.6505       | -1016.6186       | -1016.6176       | -1016.7150       | -190.61 | -191.92 | -301.41 | 171.71 |
| <i>cis</i> -B(OH) <sub>3</sub> (H <sub>2</sub> O) <sub>n</sub>  |                  |                  |                  |                  |         |         |         |        |
| <b>1-1</b>                                                      | <b>-328.8836</b> | <b>-328.8758</b> | <b>-328.8749</b> | <b>-328.9153</b> | -22.84  | -21.53  | -24.15  | 9.45   |
| 1-2                                                             | -328.8792        | -328.8720        | -328.8711        | -328.9094        | -11.29  | -11.55  | -14.18  | 24.94  |
| 1-3                                                             | -328.8812        | -328.8735        | -328.8725        | -328.9124        | -16.54  | -15.49  | -17.85  | 17.07  |
| <b>2-1</b>                                                      | <b>-405.3018</b> | <b>-405.2911</b> | <b>-405.2902</b> | <b>-405.3375</b> | -41.22  | -39.65  | -44.90  | 26.78  |
| 2-2                                                             | -405.3002        | -405.2891        | -405.2882        | -405.3371        | -37.02  | -34.39  | -39.65  | 27.83  |
| <b>3-1</b>                                                      | <b>-481.7213</b> | <b>-481.7079</b> | <b>-481.7069</b> | <b>-481.7617</b> | -63.01  | -61.70  | -69.31  | 38.86  |
| 3-2                                                             | -481.7189        | -481.7046        | -481.7037        | -481.7611        | -56.71  | -53.04  | -60.91  | 40.43  |
| <b>4-1</b>                                                      | <b>-558.1388</b> | <b>-558.1220</b> | <b>-558.1210</b> | <b>-558.1843</b> | -79.55  | -76.66  | -86.90  | 55.14  |
| 4-2                                                             | -558.1370        | -558.1211        | -558.1201        | -558.1791        | -74.83  | -74.30  | -84.54  | 68.79  |
| 4-4                                                             | -558.1373        | -558.1210        | -558.1200        | -558.1806        | -75.61  | -74.04  | -84.28  | 64.85  |
| 4-5                                                             | -558.1375        | -558.1207        | -558.1198        | -558.1827        | -76.14  | -73.25  | -83.75  | 59.34  |
| <b>5-1</b>                                                      | <b>-634.5587</b> | <b>-634.5401</b> | <b>-634.5391</b> | <b>-634.6066</b> | -102.39 | -102.13 | -115.00 | 72.20  |
| 5-2                                                             | -634.5580        | -634.5391        | -634.5382        | -634.6057        | -100.56 | -99.51  | -112.63 | 74.56  |
| 5-3                                                             | -634.5578        | -634.5391        | -634.5382        | -634.6052        | -100.03 | -99.51  | -112.63 | 75.88  |
| 5-4                                                             | -634.5564        | -634.5377        | -634.5367        | -634.6029        | -96.36  | -95.83  | -108.70 | 81.92  |
| <b>6-1</b>                                                      | <b>-710.9791</b> | <b>-710.9582</b> | <b>-710.9572</b> | <b>-711.0274</b> | -126.55 | -127.60 | -143.09 | 93.21  |
| 6-2                                                             | -710.9781        | -710.9564        | -710.9555        | -711.0300        | -123.92 | -122.87 | -138.63 | 86.38  |
| 6-3                                                             | -710.9762        | -710.9548        | -710.9538        | -711.0265        | -118.94 | -118.67 | -134.16 | 95.57  |
| 6-4                                                             | -710.9770        | -710.9560        | -710.9551        | -711.0254        | -121.04 | -121.82 | -137.58 | 98.46  |
| <b>7-1</b>                                                      | <b>-787.3984</b> | <b>-787.3748</b> | <b>-787.3738</b> | <b>-787.4504</b> | -147.82 | -149.13 | -167.24 | 108.43 |
| 7-2                                                             | -787.3965        | -787.3729        | -787.3720        | -787.4481        | -142.83 | -144.14 | -162.52 | 114.47 |
| 7-3                                                             | -787.3954        | -787.3719        | -787.3709        | -787.4467        | -139.94 | -141.51 | -159.63 | 118.15 |
| <b>8-1</b>                                                      | <b>-863.8252</b> | <b>-863.8001</b> | <b>-863.7992</b> | <b>-863.8779</b> | -188.77 | -193.50 | -214.50 | 111.85 |
| 8-2                                                             | -863.8202        | -863.7942        | -863.7934        | -863.8770        | -175.65 | -178.01 | -199.28 | 114.21 |
| <b>9-1</b>                                                      | <b>-940.2417</b> | <b>-940.2140</b> | <b>-940.2131</b> | <b>-940.2982</b> | -202.69 | -207.94 | -231.57 | 134.16 |
| 9-2                                                             | -940.2401        | -940.2119        | -940.2110        | -940.2962        | -198.49 | -202.43 | -226.06 | 139.41 |
| 9-3                                                             | -940.2371        | -940.2075        | -940.2066        | -940.2989        | -190.61 | -190.87 | -214.50 | 132.33 |
| 9-4                                                             | -940.2368        | -940.2071        | -940.2061        | -940.2991        | -189.82 | -189.82 | -213.19 | 131.80 |
| B(OH) <sub>4</sub> <sup>-</sup> (H <sub>2</sub> O) <sub>n</sub> |                  |                  |                  |                  |         |         |         |        |
| <b>1-1</b>                                                      | <b>-404.8444</b> | <b>-404.8345</b> | <b>-404.8431</b> | <b>-404.8768</b> | -24.42  | -23.10  | -50.93  | 11.29  |
| <b>2-1</b>                                                      | <b>-481.2673</b> | <b>-481.2545</b> | <b>-481.2658</b> | <b>-481.3040</b> | -55.14  | -53.56  | -91.10  | 15.49  |

|            |                  |                  |                  |                  |         |         |         |        |
|------------|------------------|------------------|------------------|------------------|---------|---------|---------|--------|
| 2-2        | -481.2659        | -481.2534        | -481.2647        | -481.3017        | -51.46  | -50.67  | -88.22  | 21.53  |
| 2-3        | -481.2660        | -481.2534        | -481.2647        | -481.3021        | -51.72  | -50.67  | -88.22  | 20.48  |
| <b>3-1</b> | <b>-557.6912</b> | <b>-557.6763</b> | <b>-557.6897</b> | <b>-557.7306</b> | -88.48  | -88.74  | -134.43 | 21.27  |
| 3-2        | -557.6911        | -557.6763        | -557.6896        | -557.7305        | -88.22  | -88.74  | -134.16 | 21.53  |
| 3-3        | -557.6880        | -557.6726        | -557.6868        | -557.7282        | -80.08  | -79.03  | -126.81 | 27.57  |
| <b>4-1</b> | <b>-634.1109</b> | <b>-634.0931</b> | <b>-634.1092</b> | <b>-634.1542</b> | -110.80 | -110.80 | -166.19 | 34.92  |
| 4-2        | -634.1075        | -634.0891        | -634.1064        | -634.1523        | -101.87 | -100.29 | -158.84 | 39.91  |
| 4-3        | -634.1088        | -634.0910        | -634.1073        | -634.1521        | -105.28 | -105.28 | -161.21 | 40.43  |
| <b>5-1</b> | <b>-710.5318</b> | <b>-710.5117</b> | <b>-710.5303</b> | <b>-710.5773</b> | -136.26 | -137.58 | -202.16 | 49.88  |
| 5-2        | -710.5297        | -710.5093        | -710.5283        | -710.5763        | -130.75 | -131.28 | -196.91 | 52.51  |
| 5-3        | -710.5293        | -710.5085        | -710.5279        | -710.5775        | -129.70 | -129.17 | -195.86 | 49.36  |
| <b>6-1</b> | <b>-786.9547</b> | <b>-786.9321</b> | <b>-786.9534</b> | <b>-787.0041</b> | -166.98 | -169.08 | -243.38 | 55.14  |
| 6-2        | -786.9515        | -786.9287        | -786.9500        | -787.0009        | -158.58 | -160.16 | -234.46 | 63.54  |
| 6-3        | -786.9536        | -786.9306        | -786.9517        | -787.0034        | -164.09 | -165.14 | -238.92 | 56.97  |
| 6-4        | -786.9535        | -786.9306        | -786.9522        | -787.0035        | -163.83 | -165.14 | -240.23 | 56.71  |
| <b>7-1</b> | <b>-863.3761</b> | <b>-863.3511</b> | <b>-863.3744</b> | <b>-863.4286</b> | -193.76 | -196.91 | -279.09 | 66.43  |
| 7-2        | -863.3757        | -863.3504        | -863.3745        | -863.4294        | -192.71 | -195.07 | -279.35 | 64.32  |
| 7-3        | -863.3747        | -863.3494        | -863.3736        | -863.4269        | -190.09 | -192.45 | -276.99 | 70.89  |
| 7-4        | -863.3738        | -863.3483        | -863.3725        | -863.4271        | -187.72 | -189.56 | -274.10 | 70.36  |
| <b>8-1</b> | <b>-939.7961</b> | <b>-939.7688</b> | <b>-939.7945</b> | <b>-939.8504</b> | -216.87 | -221.33 | -312.43 | 84.80  |
| 8-2        | -939.7929        | -939.7648        | -939.7905        | -939.8495        | -208.46 | -210.83 | -301.93 | 87.17  |
| 8-3        | -939.7942        | -939.7661        | -939.7927        | -939.8516        | -247.58 | -252.31 | -354.71 | 90.58  |
| <b>9-1</b> | <b>-1016.219</b> | <b>-1016.189</b> | <b>-1016.218</b> | <b>-1016.277</b> | -237.87 | -240.76 | -344.20 | 95.31  |
| 9-2        | -1016.2153       | -1016.1846       | -1016.2140       | -1016.2752       | -243.38 | -250.47 | -274.36 | 96.62  |
| 9-3        | -1016.2174       | -1016.1883       | -1016.1874       | -1016.2747       | -243.38 | -250.47 | -274.36 | 96.62  |
| 10-1       | -1092.6383       | -1092.6055       | -1092.6371       | -1092.6995       | -268.85 | -273.58 | -385.42 | 107.12 |

(1 a.u.= 2625.5 kJ/mol)

$E_0$ ,  $E$ ,  $H$ , and  $G$  were computed according to following equations:

$$\Delta E_0 = \{E_0(\text{M}) + E_{\text{OH}_2\text{O}} \times n - E_{\text{B}(\text{OH})_3(\text{H}_2\text{O})_n}\}$$

$$\Delta E = \{E(\text{M}) + E_{\text{H}_2\text{O}} \times n - E_{\text{B}(\text{OH})_3(\text{H}_2\text{O})_n}\}$$

$$\Delta H = \{H(\text{M}) + H_{\text{H}_2\text{O}} \times n - H_{\text{B}(\text{OH})_3(\text{H}_2\text{O})_n}\}$$

$$\Delta G = \{G(\text{M}) + G_{\text{H}_2\text{O}} \times n - G_{\text{B}(\text{OH})_3(\text{H}_2\text{O})_n}\}$$

M = *trans*-B(OH)<sub>3</sub>, *cis*-B(OH)<sub>3</sub>, B(OH)<sub>4</sub><sup>-</sup>

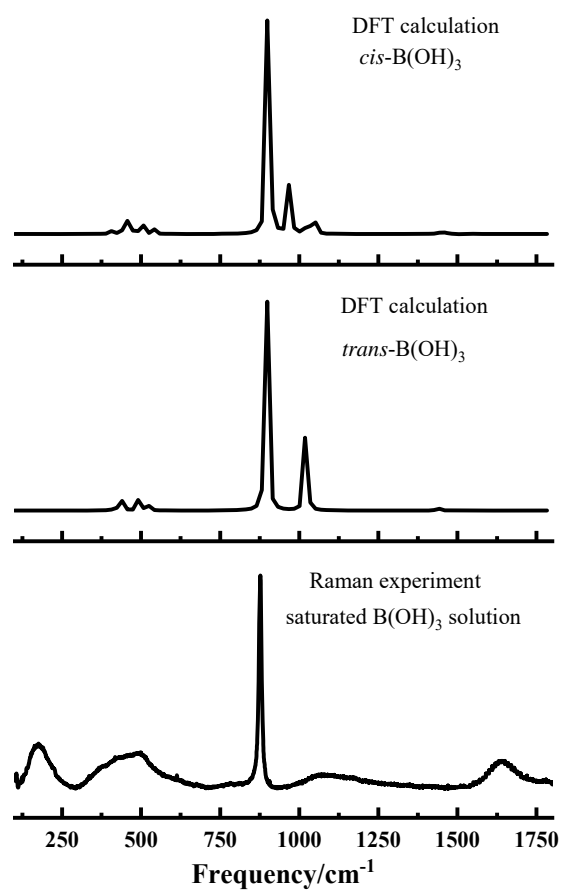

**Figure S6** Calculated and experimental Raman spectra of aqueous B(OH)<sub>3</sub> solution

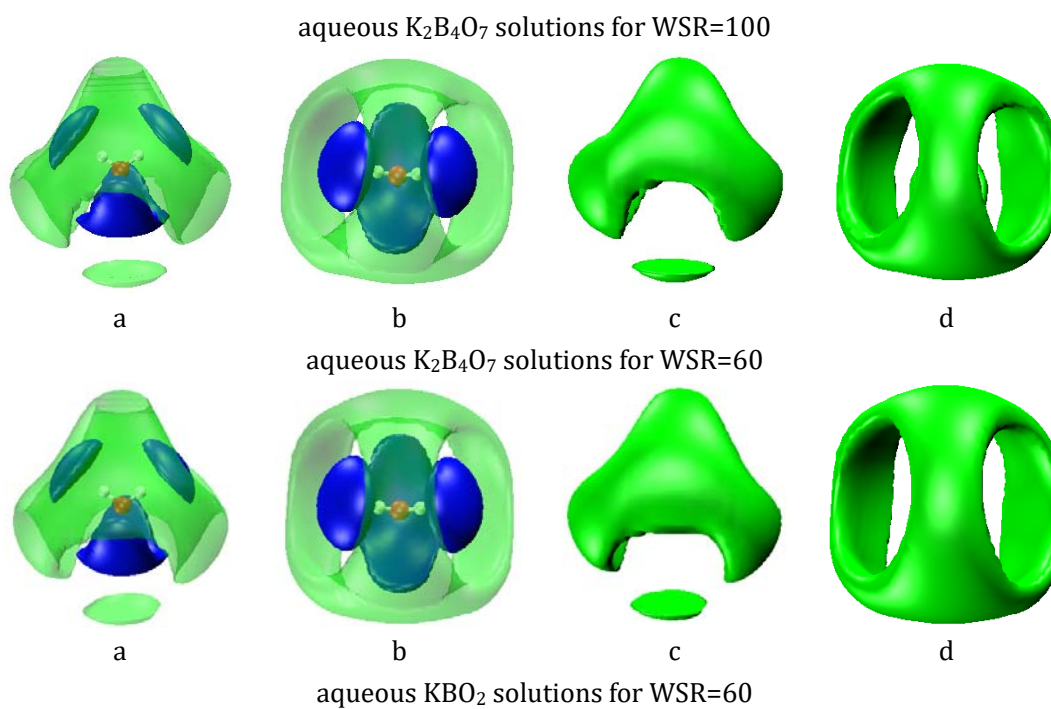

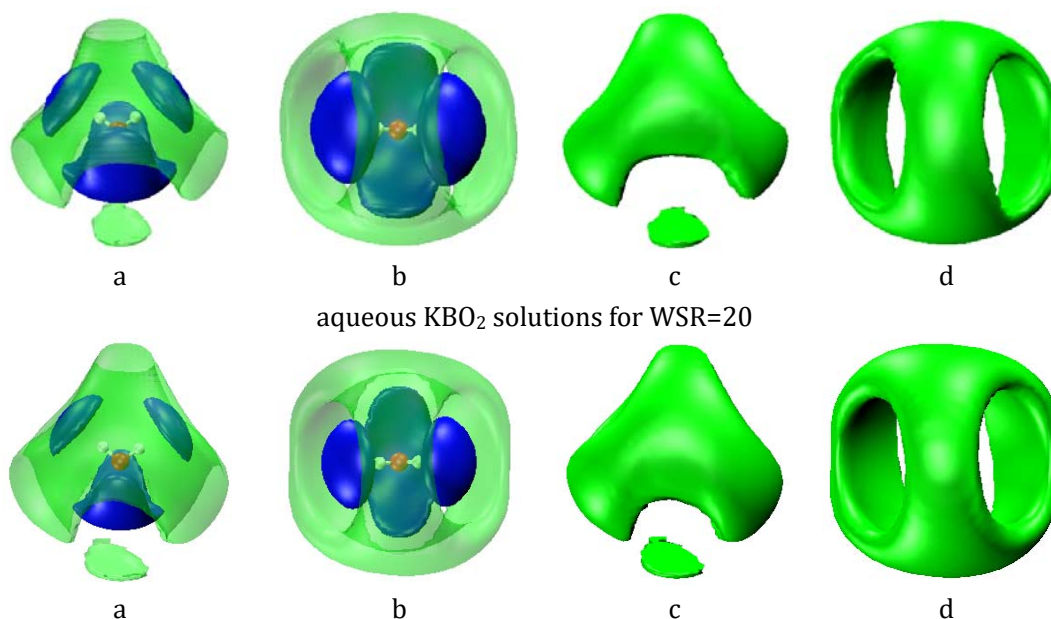

**Figure S7** Spatial density functions of neighboring water molecules with respect to the central water molecule. The dark blue lobes represent the first coordination sphere, and the light green and semitransparent lobes/green lobes represent the second sphere. The red and white balls in the center represent the O and H atoms of  $\text{H}_2\text{O}$ , respectively. (a): side view, (b): top view; (c): side view of the second hydration sphere of water; (d): top view of the second hydration sphere of water.

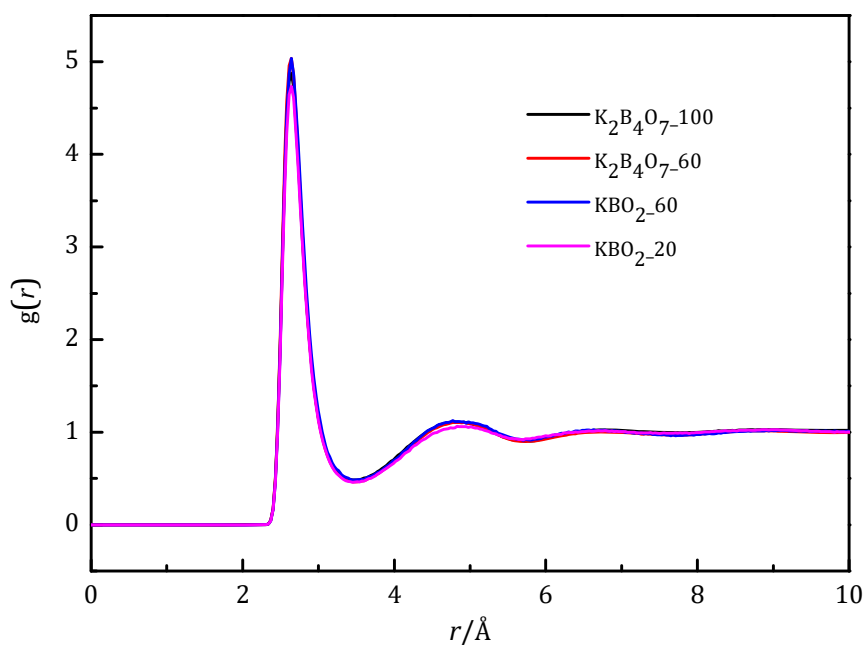

**Figure S8** Pair distribution functions of K-O(W) at various concentrations obtained using EPSR modeling

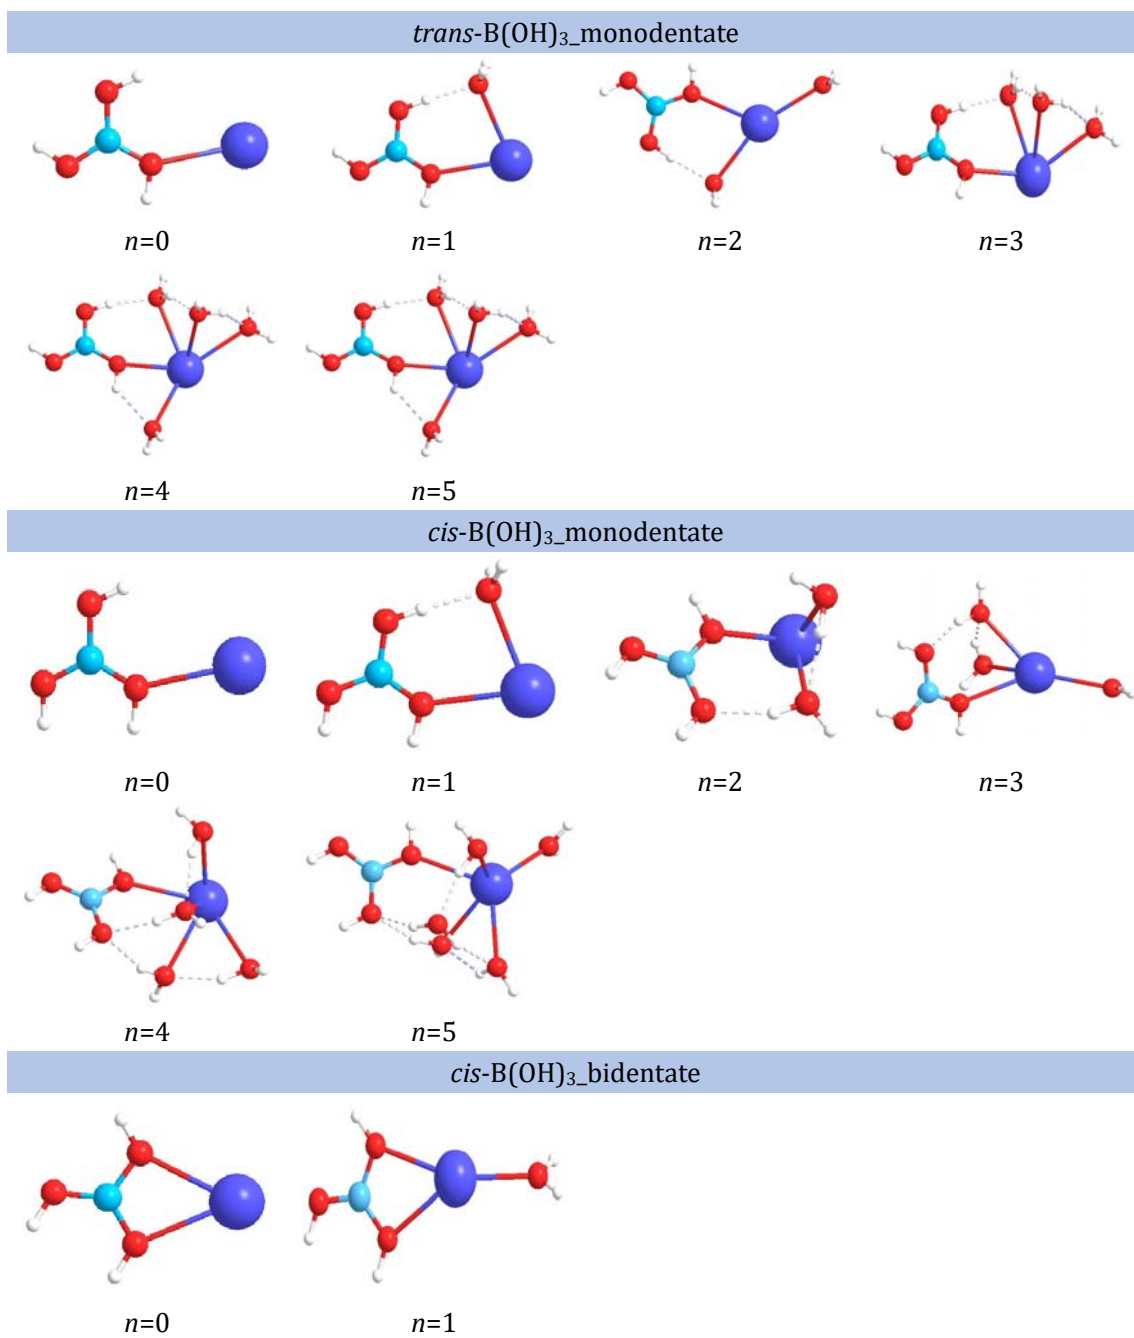

**Figure S9** Optimized structures of  $[\text{KB}(\text{OH})_3(\text{H}_2\text{O})_n]^+$  and  $[\text{KB}(\text{OH})_4(\text{H}_2\text{O})_n]$

**Table S5** Energy and structural parameters of  $[\text{KB}(\text{OH})_3(\text{H}_2\text{O})_n]^+$  and  $[\text{KB}(\text{OH})_4(\text{H}_2\text{O})_n]$ 

| <i>n</i>                                          | <i>E</i> <sub>0</sub> /a.u. | <i>E</i> /a.u. | <i>H</i> /a.u. | <i>G</i> /a.u. | $\Delta E_0$ /(kJ/mol) | $\Delta E$ /(kJ/mol) | $\Delta H$ /(kJ/mol) | $\Delta G$ /(kJ/mol) | <i>r</i> <sub>K-B</sub> /Å | <i>r</i> <sub>K-O</sub> /Å | <i>r</i> <sub>K-O(W)</sub> /Å |
|---------------------------------------------------|-----------------------------|----------------|----------------|----------------|------------------------|----------------------|----------------------|----------------------|----------------------------|----------------------------|-------------------------------|
| <b><i>trans</i>-B(OH)<sub>3</sub>_monodentate</b> |                             |                |                |                |                        |                      |                      |                      |                            |                            |                               |
| 0                                                 | -852.3374                   | -852.3307      | -852.3298      | -852.3696      |                        |                      |                      |                      | 3.897                      | 2.748                      |                               |
| 1                                                 | -928.7590                   | -928.7493      | -928.7484      | -928.7950      | -27.31                 | -26.78               | -29.41               | 8.93                 | 3.819                      | 2.737                      | 2.749                         |
| 2                                                 | -1005.1741                  | -1005.1603     | -1005.1594     | -1005.2169     | -37.54                 | -33.61               | -38.86               | 27.04                | 3.838                      | 2.744                      | 2.722                         |
| 3                                                 | -1081.5959                  | -1081.5807     | -1081.5798     | -1081.6382     | -65.37                 | -65.11               | -72.98               | 46.73                | 3.820                      | 2.731                      | 2.789                         |
| 4                                                 | -1158.0133                  | -1157.9935     | -1157.9926     | -1158.0630     | -81.65                 | -76.66               | -87.16               | 57.23                | 3.885                      | 2.680                      | 2.825                         |
| 5                                                 | -1234.4318                  | -1234.4094     | -1234.4084     | -1234.4853     | -100.82                | -96.3559             | -109.22              | 74.30                | 3.809                      | 2.705                      | 2.80                          |
| <b><i>cis</i>-B(OH)<sub>3</sub>_monodentate</b>   |                             |                |                |                |                        |                      |                      |                      |                            |                            |                               |
| 0                                                 | -852.3393                   | -852.3325      | -852.3316      | -852.3717      |                        |                      |                      |                      | 3.917                      | 2.765                      |                               |
| 1                                                 | -928.7561                   | -928.7464      | -928.7455      | -928.7919      | -14.70                 | -14.44               | -17.06               | 22.57                | 3.837                      | 2.746                      | 2.743                         |
| 2                                                 | -1005.1741                  | -1005.1612     | -1005.1603     | -1005.2144     | -32.56                 | -31.24               | -36.49               | 39.12                | 3.883                      | 2.770                      | 2.749                         |
| 3                                                 | -1081.5895                  | -1081.5722     | -1081.5713     | -1081.6373     | -43.58                 | -38.07               | -45.94               | 54.61                | 3.916                      | 2.801                      | 2.747                         |
| 4                                                 | -1158.0097                  | -1157.9904     | -1157.9895     | -1158.0567     | -67.21                 | -63.80               | -74.30               | 79.29                | 3.897                      | 2.785                      | 2.770                         |
| 5                                                 | -1234.4268                  | -1234.4039     | -1234.4029     | -1234.4815     | -82.70                 | -77.19               | -90.05               | 89.79                | 3.889                      | 2.776                      | 2.758                         |
| <b><i>cis</i>-B(OH)<sub>3</sub>_bidentate</b>     |                             |                |                |                |                        |                      |                      |                      |                            |                            |                               |
| 0                                                 | -852.3346                   | -852.3280      | -852.3271      | -852.3662      |                        |                      |                      |                      | 3.261                      | 2.757                      |                               |
| 1                                                 | -928.7542                   | -928.7435      | -928.7425      | -928.7923      | -22.05                 | -18.64               | -21.0                | 7.09                 | 3.272                      | 2.771                      | 2.691                         |

(1 a.u.= 2625.5 kJ/mol)

*E*<sub>0</sub>, *E*, *H*, and *G* were computed according to following equations:

$$\Delta E_0 = \{E_0(\text{M}) + E_{0\text{H}_2\text{O}} \times n - E_{0\text{KB}(\text{H}_2\text{O})_n}\}; \Delta E = \{E(\text{M}) + E_{\text{H}_2\text{O}} \times n - E_{\text{KB}(\text{H}_2\text{O})_n}\}; \Delta H = \{H(\text{M}) + H_{\text{H}_2\text{O}} \times n - H_{\text{KB}(\text{H}_2\text{O})_n}\}$$

$$\Delta G = \{G(\text{M}) + G_{\text{H}_2\text{O}} \times n - G_{\text{KB}(\text{H}_2\text{O})_n}\}$$

M is the ion pair between K<sup>+</sup> and B(OH)<sub>3</sub>

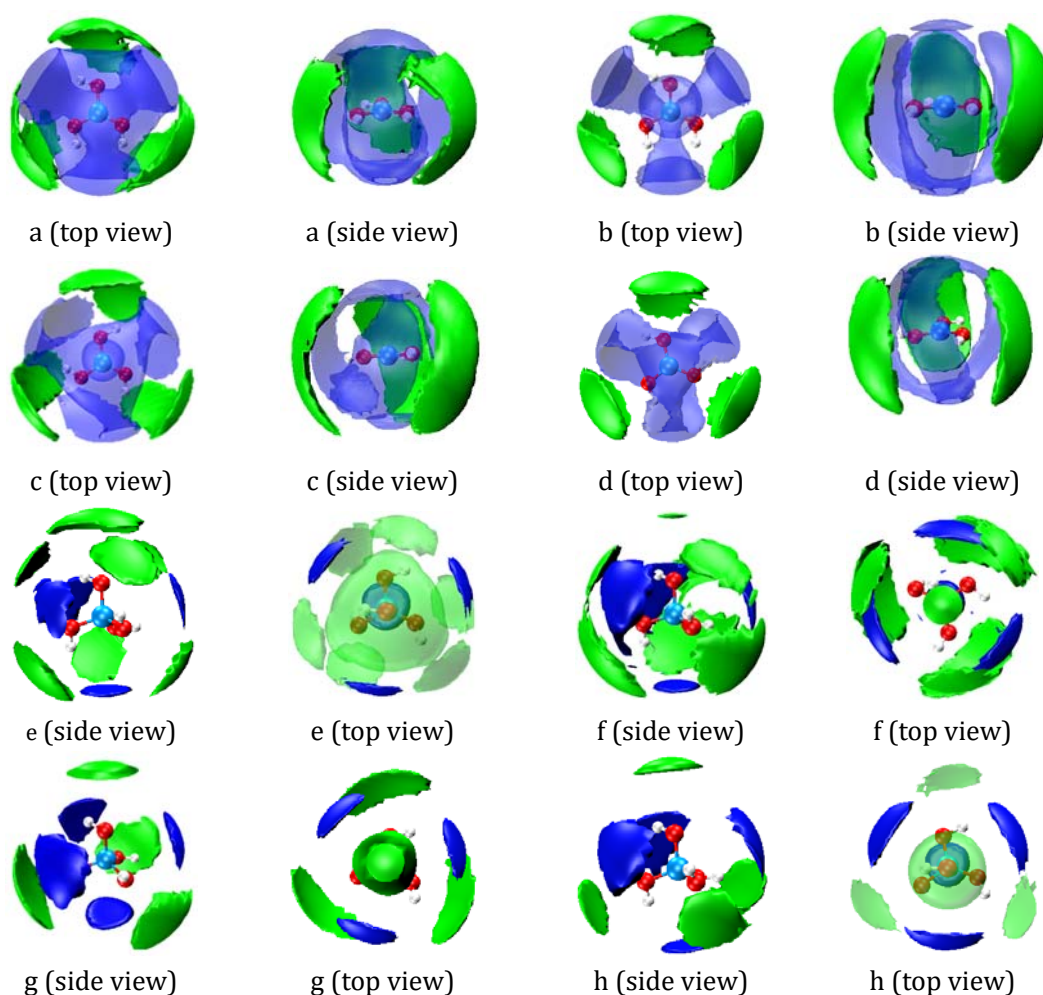

**Figure S10** Spatial density function surfaces showing the probability density for correlations of hydration water molecules with respect to the central  $[\text{B}(\text{OH})_3]$  and  $[\text{B}(\text{OH})_4^-]$  moieties. The blue and semitransparent lobes represent water molecules in the first (direct) hydration shell, whilst the green lobes represent water molecules in the second (indirect) hydration shell. For the first and second hydration shells, the isosurfaces have been selected to show the distribution of neighbours with the threshold selected to show the most probable 30% and 20% of neighbour locations respectively. a, b: the *cis*- $\text{B}(\text{OH})_3$  in aqueous  $\text{K}_2\text{B}_4\text{O}_7$  solutions with WSR = 100 and 60; c, d: the *trans*- $\text{B}(\text{OH})_3$  in aqueous  $\text{K}_2\text{B}_4\text{O}_7$  solutions with WSR = 100 and 60; e, f: the  $\text{B}(\text{OH})_4^-$  anion in aqueous  $\text{K}_2\text{B}_4\text{O}_7$  solutions with WSR= 100 and 60; g, h: the  $\text{B}(\text{OH})_4^-$  anion in aqueous  $\text{KBO}_2$  solutions with WSR=60 and 20; the pink, red, and white balls in the center respectively represent B, O, and H atoms of  $\text{B}(\text{OH})_3$  or  $\text{B}(\text{OH})_4^-$ . The first (direct) hydration shell of  $\text{B}(\text{OH})_3$  is in the range 2.6 to 4.5 Å, and the second shell is in the range 4.6 to 5.2 Å. The first (direct) hydration shell of  $\text{B}(\text{OH})_4^-$  is in the range 2.6 to 3.9 Å, and the second shell is in the range 3.7 to 4.8 Å.

**Table S6** Structural parameters of  $[\text{B}(\text{OH})_3(\text{H}_2\text{O})_n]$  and  $[\text{B}(\text{OH})_4^-(\text{H}_2\text{O})_n]$  clusters

| Species | $n$ | B-O   | B-O(W) <sub>dir</sub> | B-O(W) <sub>inter</sub> | B-O(W) <sub>axial</sub> | O(B)-O(W) | O(W)-O(W) |
|---------|-----|-------|-----------------------|-------------------------|-------------------------|-----------|-----------|
|         | 1   | 1.367 | 3.227                 |                         |                         | 2.803     |           |
|         | 2   | 1.367 | 3.218                 |                         |                         | 2.796     |           |
|         | 3   | 1.367 | 3.511                 |                         |                         | 2.76      | 2.725     |
|         | 4   | 1.367 | 3.430                 |                         |                         | 2.764     | 2.723     |

|                                                                  |                                                                |       |       |       |       |       |       |       |
|------------------------------------------------------------------|----------------------------------------------------------------|-------|-------|-------|-------|-------|-------|-------|
| <i>trans</i> -B(OH) <sub>3</sub> (H <sub>2</sub> O) <sub>n</sub> | 5                                                              | 1.367 | 3.564 |       |       | 2.742 | 2.72  |       |
|                                                                  | 6                                                              | 1.367 | 3.653 |       |       | 2.721 | 2.715 |       |
|                                                                  | 7                                                              | 1.367 | 3.631 | 4.593 |       | 2.71  | 2.79  |       |
|                                                                  | 8                                                              | 1.367 | 3.626 | 4.469 |       | 2.727 | 2.794 |       |
|                                                                  | 9                                                              | 1.367 | 3.625 | 4.446 |       | 2.753 | 2.786 |       |
|                                                                  | 10                                                             | 1.367 | 3.619 | 4.167 | 2.729 | 2.755 | 2.782 |       |
|                                                                  | 11                                                             | 1.367 | 3.628 | 4.576 |       | 2.757 | 2.824 |       |
|                                                                  | <i>cis</i> -B(OH) <sub>3</sub> (H <sub>2</sub> O) <sub>n</sub> | 1     | 1.367 | 3.224 |       |       | 2.849 |       |
|                                                                  |                                                                | 2     | 1.368 | 3.234 |       |       | 2.825 |       |
|                                                                  |                                                                | 3     | 1.368 | 3.534 |       |       | 2.796 | 2.732 |
|                                                                  |                                                                | 4     | 1.368 | 3.476 |       |       | 2.816 | 2.724 |
| 5                                                                |                                                                | 1.367 | 3.630 |       |       | 2.798 | 2.791 |       |
| 6                                                                |                                                                | 1.368 | 3.558 | 4.494 |       | 2.792 | 2.78  |       |
| 7                                                                |                                                                | 1.369 | 3.488 | 4.303 |       | 2.769 | 2.782 |       |
| 8                                                                |                                                                | 1.369 | 3.489 | 3.884 |       | 2.755 | 2.782 |       |
| 9                                                                |                                                                | 1.368 | 3.521 | 4.191 | 4.401 | 2.795 | 2.802 |       |
| 9                                                                |                                                                | 1.368 | 3.478 | 4.21  |       |       |       |       |
| B(OH) <sub>4</sub> <sup>-</sup> (H <sub>2</sub> O) <sub>n</sub>  | 1                                                              | 1.473 | 3.077 |       |       | 2.807 |       |       |
|                                                                  | 2                                                              | 1.473 | 3.359 |       |       | 2.768 | 2.909 |       |
|                                                                  | 3                                                              | 1.473 | 3.570 |       |       | 2.713 | 2.924 |       |
|                                                                  | 4                                                              | 1.473 | 3.650 |       |       | 2.754 | 2.849 |       |
|                                                                  | 5                                                              | 1.473 | 3.336 |       |       | 2.838 | 2.897 |       |
|                                                                  | 6                                                              | 1.473 | 3.415 |       |       | 2.835 | 2.873 |       |
|                                                                  | 7                                                              | 1.473 | 3.537 |       |       | 2.801 | 2.820 |       |
|                                                                  | 8                                                              | 1.473 | 3.421 |       |       | 2.830 | 2.874 |       |
|                                                                  | 9                                                              | 1.473 | 3.488 |       |       | 2.810 | 2.841 |       |
|                                                                  | 10                                                             | 1.473 | 3.482 | 4.595 |       | 2.812 | 2.839 |       |

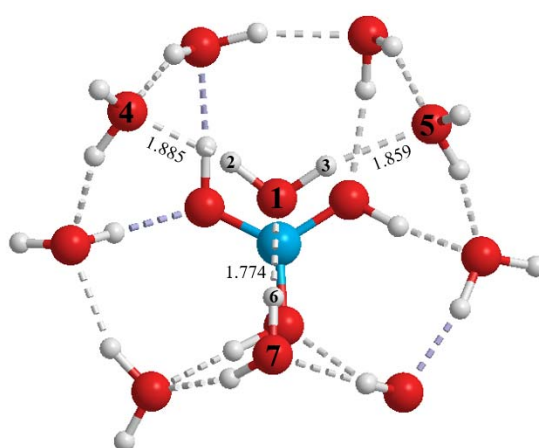

**Figure S11** Minimum energy configuration of B(OH)<sub>3</sub>(H<sub>2</sub>O)<sub>10</sub>

**Table S7** B-O(W) and hydrogen bond values of B(OH)<sub>3</sub>(H<sub>2</sub>O)<sub>10</sub> during the structural optimization



| optimization step | B-O(W) | O <sub>(4)</sub> ...H <sub>(2)</sub> | O <sub>(5)</sub> ...H <sub>(3)</sub> | O <sub>(1)</sub> ...H <sub>(6)</sub> |
|-------------------|--------|--------------------------------------|--------------------------------------|--------------------------------------|
| 0                 | 4.241  | 2.377                                | 2.357                                | 2.0                                  |
| 7                 | 3.226  | 1.958                                | 2.596                                | 2.169                                |
| 14                | 2.920  | 1.922                                | 1.916                                | 1.928                                |
| 28                | 2.735  | 1.882                                | 1.861                                | 1.776                                |
| 40                | 2.728  | 1.882                                | 1.859                                | 1.775                                |
| 50                | 2.729  | 1.882                                | 1.861                                | 1.775                                |
| final step        | 2.729  | 1.884                                | 1.859                                | 1.774                                |

### Definition of reduced density gradient (RDG)

$$\text{RDG}(r) = \frac{1}{2(3\pi^2)^{1/3}} \frac{|\nabla\rho(r)|}{\rho(r)^{4/3}}$$

where  $\nabla$  is the gradient operator.  $|\nabla\rho(r)|$  is the magnitude of the electron density gradient.

$$\Omega(r) = \text{sign}[\lambda_2(r)]\rho(r)$$

where  $\lambda_2$  is the second eigenvalue of three eigenvalues.  $\text{sign}(\lambda_2)$  is the sign of the second largest eigenvalue of the electron density Hessian matrix  $\lambda_2$  at position  $r$ .  $\text{sign}$  is the symbol (+/-) of the eigenvalue.  $\rho(r)$  is the electron density at position  $r$ , which reflects the interaction intensity.

### References

- (S1) P. Toledano and A. Benhassaine, *Rev. Chim. Minér.*, 1970, **7**, 287-291.
- (S2) A. K. Soper and E. R. Barney, *J. Appl. Cryst.*, 2011, **44**, 714-726.
- (S3) D. C. Palmer, *Z. Kristallogr.*, 2015, **230**, 559-572.
- (S4) J. R. Clark and C. L. Christ, *Acta Cryst. B*, 1977, **33**, 3272-3273.
- (S5) M. Marezio, H. A. Plettinger and W. H. Zachariasen, *Acta Cryst.*, 1963, **16**, 975-980.
